# Supplementary material for: Large-scalable RTCVD Graphene/PEDOT:PSS hybrid conductive film for application in transparent and flexible thermoelectric nanogenerators
Source: Royal Society of Chemistry journal article supplement (doi:10.1039/c7ra02980b), 2017-01-01
Supplement: c7ra02980b1.pdf [file c7ra02980b1.pdf]

# Large-scalable RTCVD Graphene/PEDOT:PSS Hybrid Conductive Film for its Application in Transparent and Flexible Thermoelectric Nanogenerators

*Chanil Park,<sup>‡a</sup> Dohyuk Yoo,<sup>‡a</sup> Soeun Im,<sup>a</sup> Soyeon Kim,<sup>a</sup> Wonseok Cho,<sup>a</sup> Jaechul Ryu,<sup>b</sup> and*

*Jung Hyun Kim<sup>\*a</sup>*

<sup>a</sup>Department of Chemical and Biomolecular Engineering, Yonsei University, Yeonseo 50,  
Seodaemun-gu, Seoul 120–749, Republic of Korea.

<sup>b</sup>Haesung 2nd Building 8F 508, Teheran-ro, Gangnam-gu, Seoul 135-725, Republic of Korea

\*E-mail: [jayhkim@yonsei.ac.kr](mailto:jayhkim@yonsei.ac.kr)

‡C.P. and D.Y. contributed equally to this work.

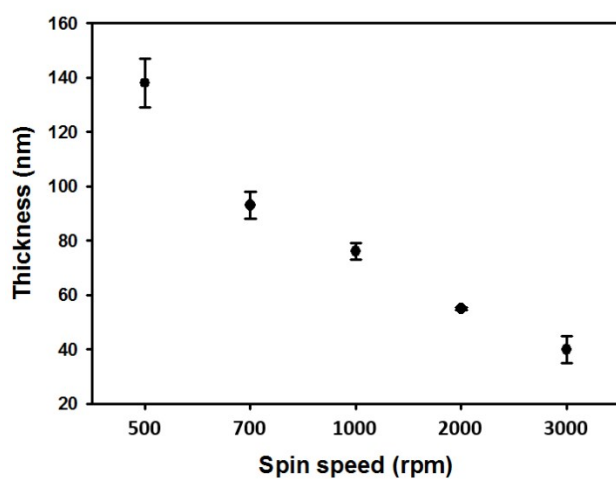

**Figure S1.** Thickness of the graphene/PEDOT:PSS hybrid films, which were coated using various spin speeds.

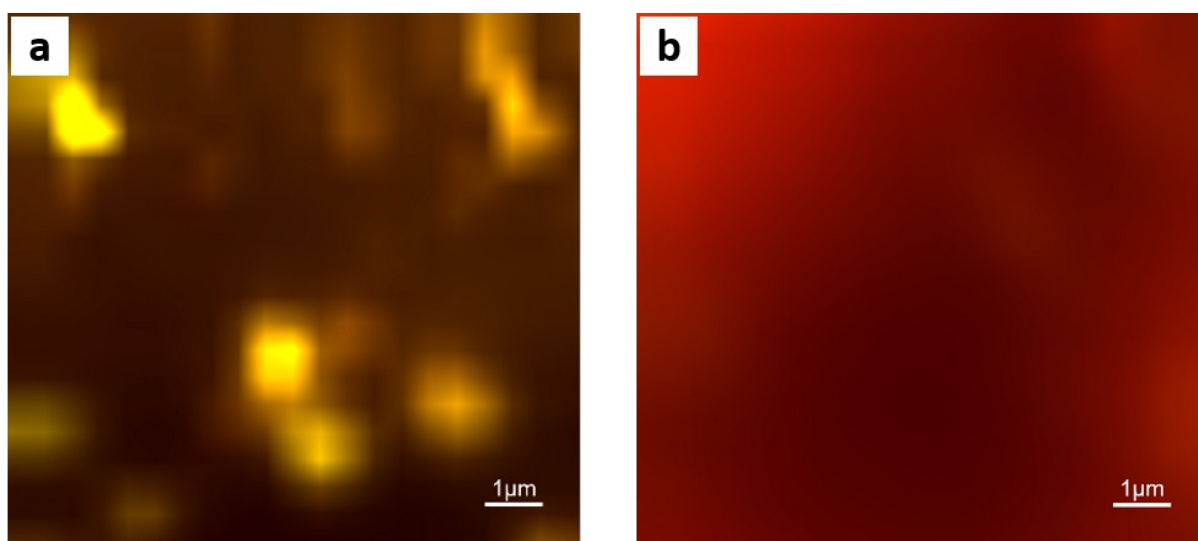

**Figure S2.** Raman spectral mapping image of (a) RTCVD graphene, and (b) a graphene/PEDOT:PSS hybrid film.

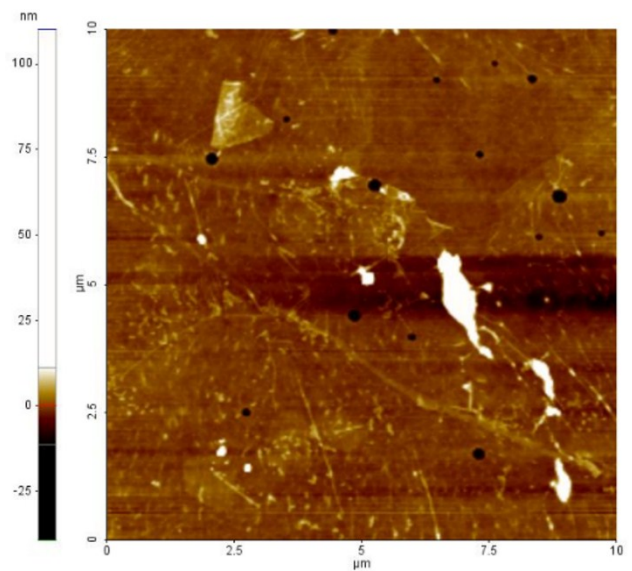

**Figure S3.** AFM image of RTCVD graphene on the Cu foil.
